# Supplementary material for: Collateral sensitivity to pleuromutilins in vancomycin-resistant Enterococcus faecium
Source: PubMed Central journal article supplement (PMC8990069; doi:10.1038/s41467-022-29493-0), 2022-04-07
Supplement: 41467_2022_29493_MOESM1_ESM.pdf [file 41467_2022_29493_MOESM1_ESM.pdf]

1  
2  
3  
4  
5  
6  
7  
8  
9  
10  
11  
12  
13  
14  
15  
16  
17  
18  
19

## Supplementary for

### **Collateral sensitivity to pleuromutilins in vancomycin-resistant**

#### ***Enterococcus faecium***

Qian Li<sup>†</sup>, Shang Chen<sup>†</sup>, Kui Zhu<sup>\*</sup>, Yucheng Huang, Zhangqi Shen, Shuangyang Ding,  
Danxia Gu, Qiwen Yang, Hong-li Sun, Fupin Hu, Hui Wang, Jiachang Cai, Bing Ma,  
Rong Zhang<sup>\*</sup>, Jianzhong Shen<sup>\*</sup>

<sup>†</sup> These authors contributed equally to this work.

<sup>\*</sup> Corresponding authors.

*Email:* zhuk@cau.edu.cn (K.Z.); zhang-rong@zju.edu.cn (R.Z.); sjz@cau.edu.cn (J.S.)

#### **This file includes:**

Supplementary Figs. 1 to 22  
Supplementary Tables 1 to 8  
Reference

## Content list

|    |                              |    |
|----|------------------------------|----|
| 21 | <b>Supplementary Figures</b> |    |
| 22 | Supplementary Fig. 1 -----   | 1  |
| 23 | Supplementary Fig. 2 -----   | 2  |
| 24 | Supplementary Fig. 3 -----   | 3  |
| 25 | Supplementary Fig. 4 -----   | 4  |
| 26 | Supplementary Fig. 5 -----   | 5  |
| 27 | Supplementary Fig. 6 -----   | 6  |
| 28 | Supplementary Fig. 7 -----   | 7  |
| 29 | Supplementary Fig. 8 -----   | 8  |
| 30 | Supplementary Fig. 9 -----   | 9  |
| 31 | Supplementary Fig. 10 -----  | 10 |
| 32 | Supplementary Fig. 11 -----  | 11 |
| 33 | Supplementary Fig. 12 -----  | 12 |
| 34 | Supplementary Fig. 13 -----  | 13 |
| 35 | Supplementary Fig. 14 -----  | 14 |
| 36 | Supplementary Fig. 15 -----  | 15 |
| 37 | Supplementary Fig. 16 -----  | 16 |
| 38 | Supplementary Fig. 17 -----  | 17 |
| 39 | Supplementary Fig. 18 -----  | 18 |
| 40 | Supplementary Fig. 19 -----  | 19 |
| 41 | Supplementary Fig. 20 -----  | 20 |
| 42 | Supplementary Fig. 21 -----  | 21 |
| 43 | Supplementary Fig. 22 -----  | 22 |
| 44 | <b>Supplementary Tables</b>  |    |
| 45 | Supplementary Table 1 -----  | 23 |
| 46 | Supplementary Table 2 -----  | 24 |
| 47 | Supplementary Table 3 -----  | 25 |
| 48 | Supplementary Table 4 -----  | 26 |
| 49 | Supplementary Table 5 -----  | 27 |
| 50 | Supplementary Table 6 -----  | 28 |
| 51 | Supplementary Table 7 -----  | 29 |
| 52 | Supplementary Table 8 -----  | 30 |
| 53 | <b>Reference</b> -----       | 31 |
| 54 |                              |    |



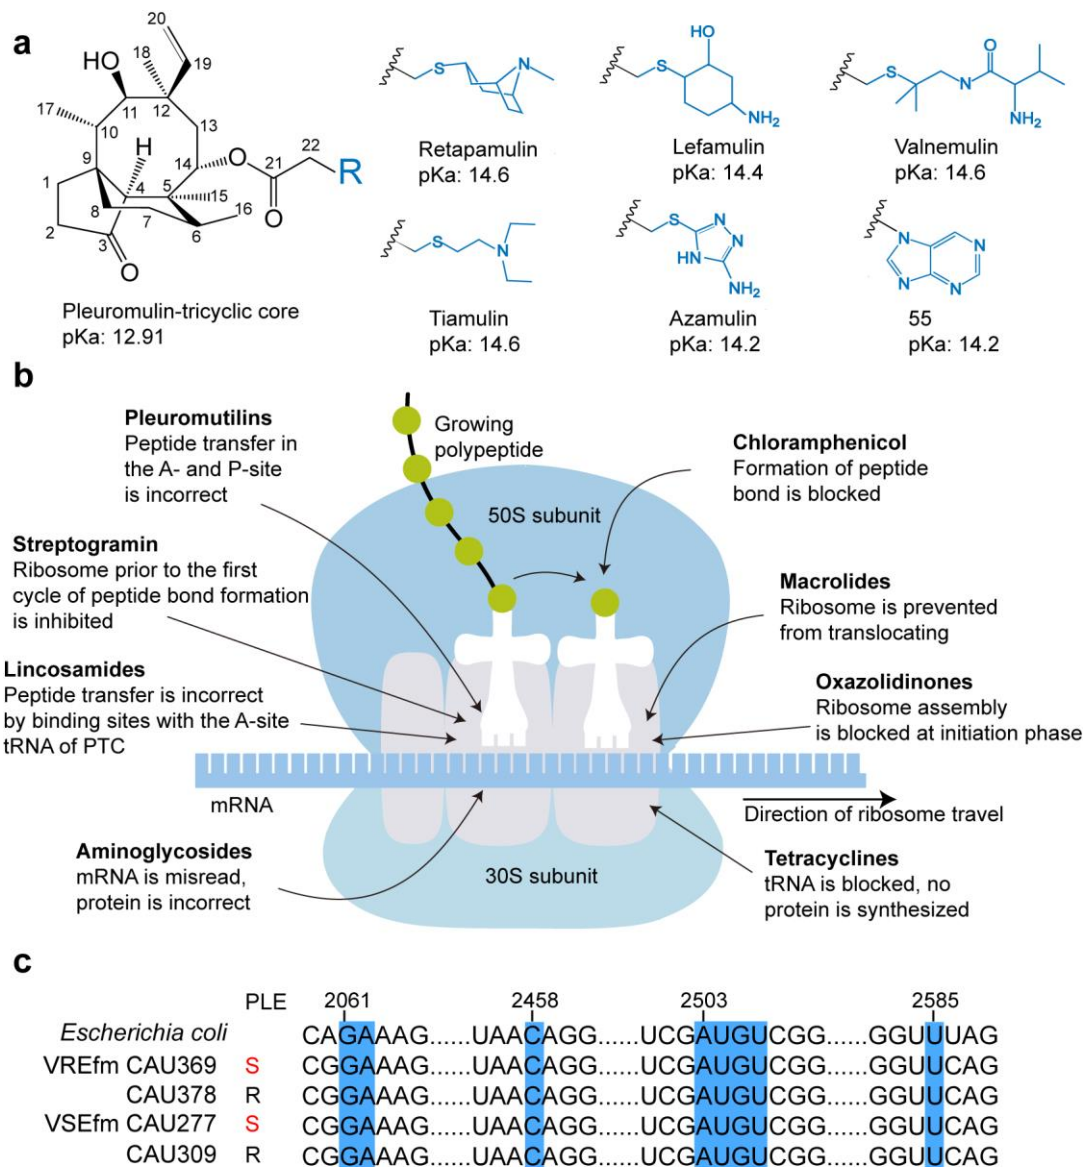

65

66

## Supplementary Fig. 2 The mode of action of pleuromutilins

67

(a) Chemical structures of pleuromutilins. Compound **55** in (a) was named in the reference<sup>1</sup>.

68

69

(b) Modes of action of ribosome-targeting antibiotics.

70

(c) Binding sites of pleuromutilins in the PTC domain. No mutations were found at

71

the sites in 40 *E. faecium* isolates. More details about the binding sites were shown in

72

Supplementary Table 4.

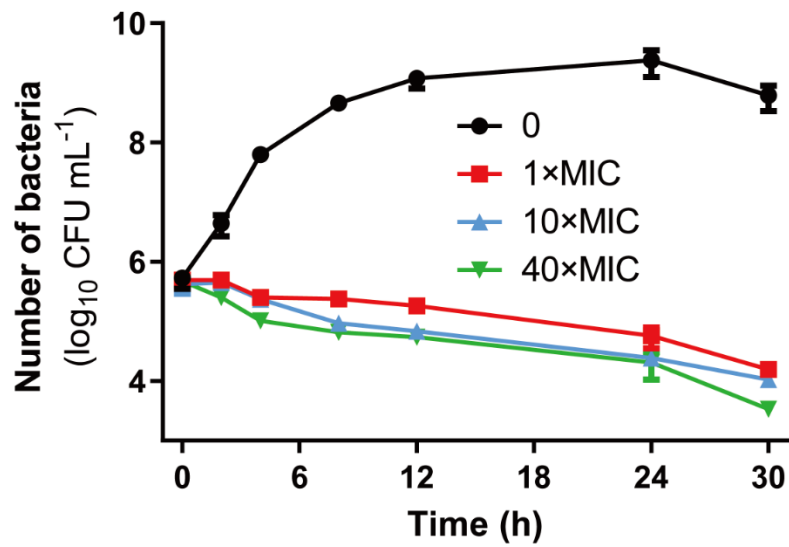

73

74 **Supplementary Fig. 3 Bacteriostatic activity of lefamulin against VRE<sub>fm</sub>.**

75 Time-dependent killing curves of VRE<sub>fm</sub> CAU369 in the presence of lefamulin.  
 76 VRE<sub>fm</sub> CAU369 at exponential phase were challenged with 1×MIC, 10×MIC and  
 77 40×MIC lefamulin. Experiments were performed as three biologically independent  
 78 experiments, and the mean ± S.D. (n = 3) is shown. *P* values were determined by non-  
 79 parametric one-way ANOVA.

80

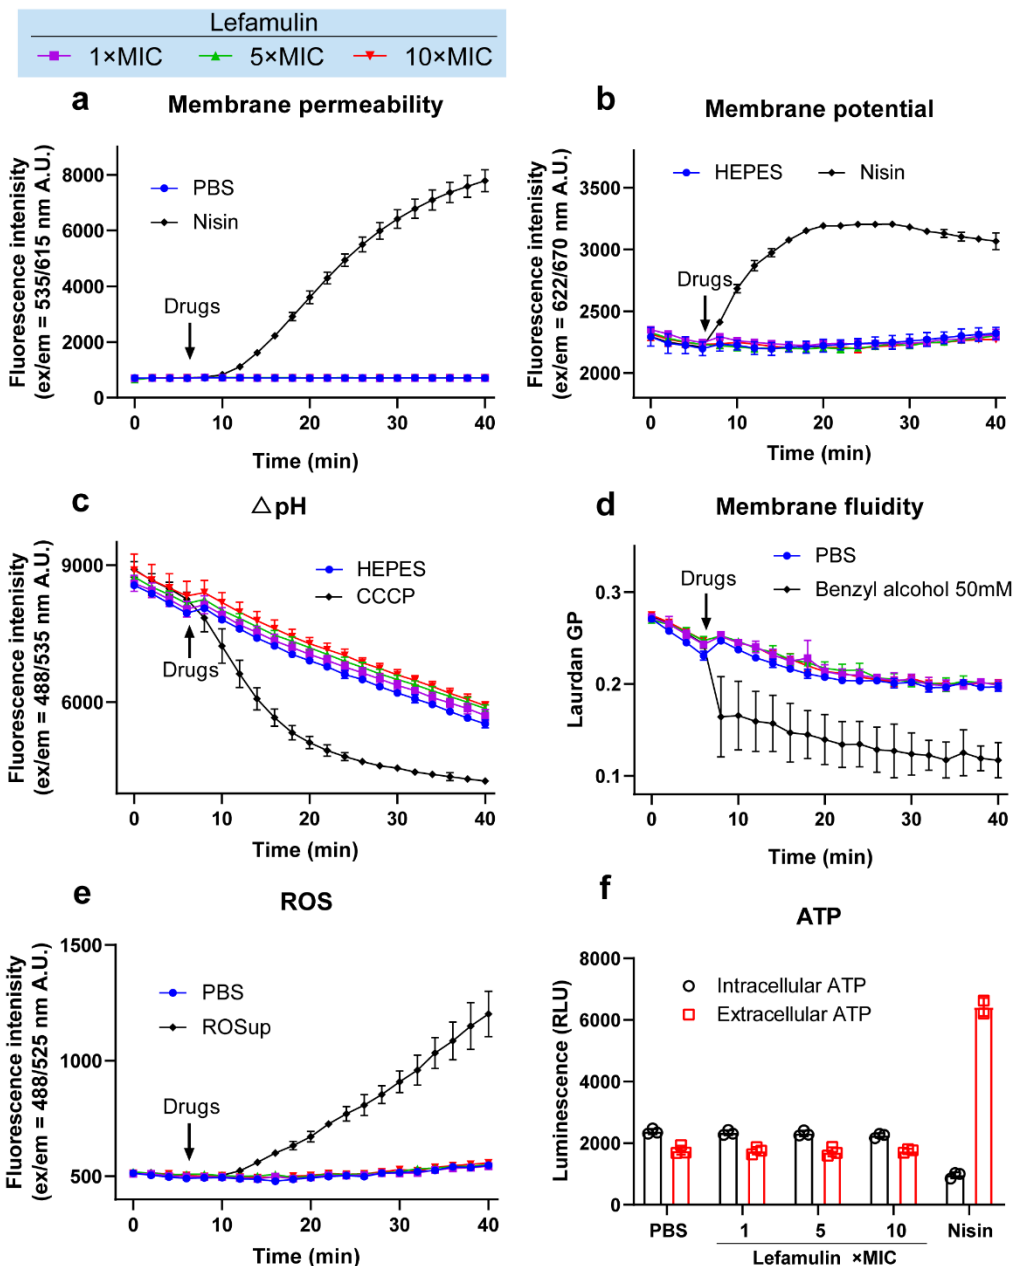

81

82 **Supplementary Fig. 4 Maintained integrity and functions of VRE<sub>fm</sub> membrane.**

83 (a-d) Membrane permeability (a), membrane potential (b),  $\Delta$ pH (c) and membrane  
 84 fluidity (d) of VRE<sub>fm</sub> CAU369 treated with lefamulin at the levels of 1×MIC, 5×MIC  
 85 and 10×MIC. The arrows indicate the time points of added compounds. Nisin (100  
 86  $\mu$ g/mL), CCCP (50  $\mu$ M) and benzyl alcohol (50 mM) were used as positive controls.  
 87 PI (10  $\mu$ M), DiSC3(5) (1  $\mu$ M), BCECF-AM (10  $\mu$ M) and Laurdan were used as  
 88 probes.

89 (e-f) ROS accumulation (e) and levels of intracellular and extracellular ATP (f) in  
 90 VRE<sub>fm</sub> CAU369 in the presence of lefamulin. ROSup and Nisin (100  $\mu$ g/mL) were  
 91 used as positive controls.

92 Experiments were performed as three biologically independent experiments, and the  
 93 mean  $\pm$  S.D. (n = 3) is shown. *P* values were determined by non-parametric one-way  
 94 ANOVA.

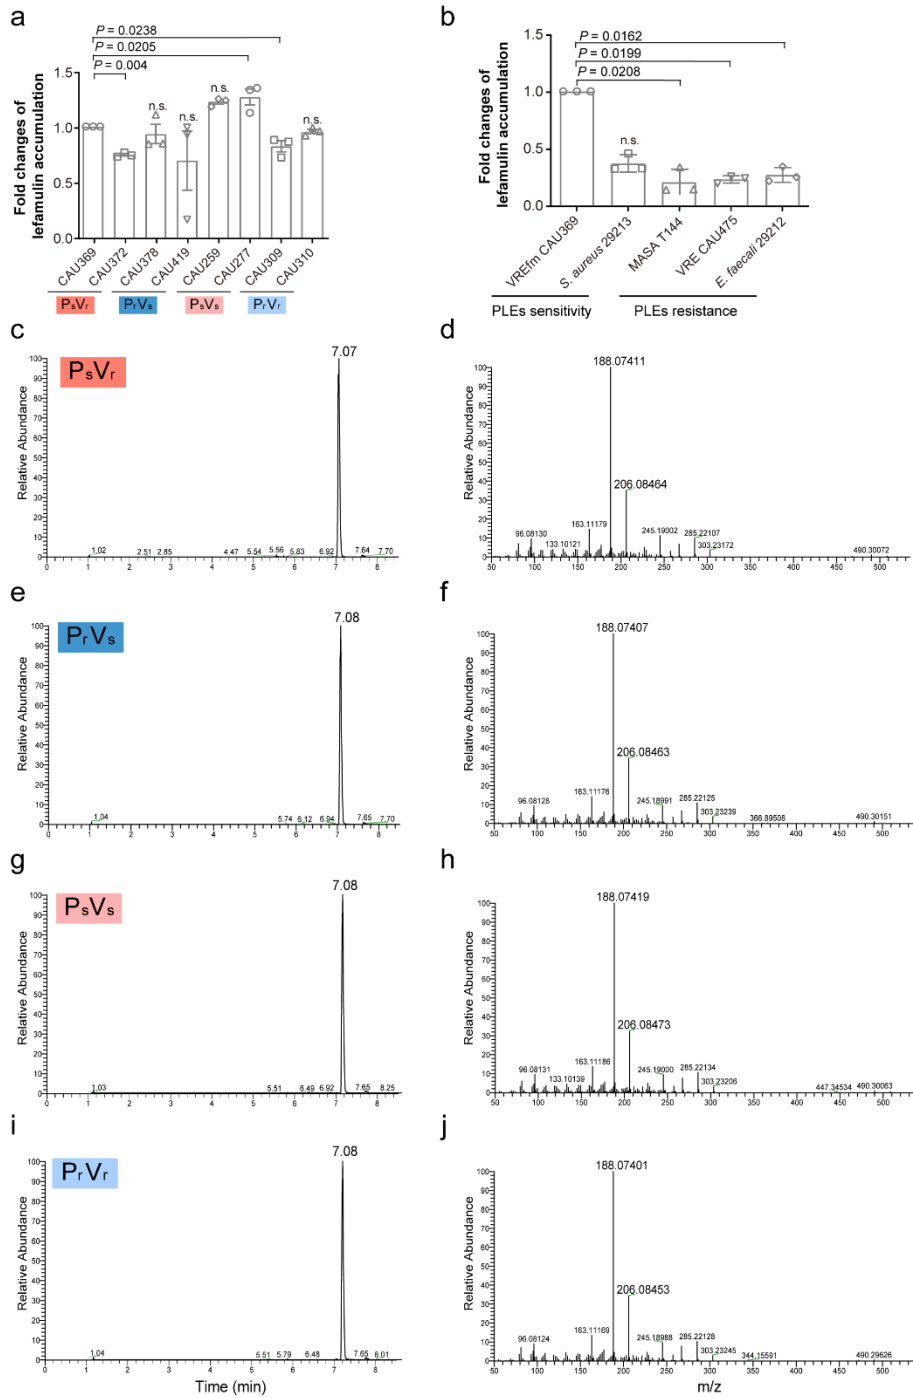

95

96 **Supplementary Fig. 5 Accumulated lefamulin in bacteria.**

97 **(a-b)** Fold changes of lefamulin accumulation in diverse isolates of *E. faecium* **(a)**, *E.*  
 98 *faecalis* and *S. aureus* **(b)**. Accumulations of lefamulin in *E. faecium* (n = 8), *E.*  
 99 *faecalis* (n = 2) and *S. aureus* (n = 2) after treatments of 0.3 µg/mL lefamulin for 1 h.  
 100 **(c-j)** Chromatographic and MS/MS spectra of lefamulin in four phenotypes of *E.*  
 101 *faecium* isolates. No further chemical modifications were observed in all isolates.  
 102 Experiments were performed as three biologically independent experiments, and the  
 103 mean ± S.D. (n = 3) is shown. *P* values were determined by non-parametric one-way  
 104 ANOVA.

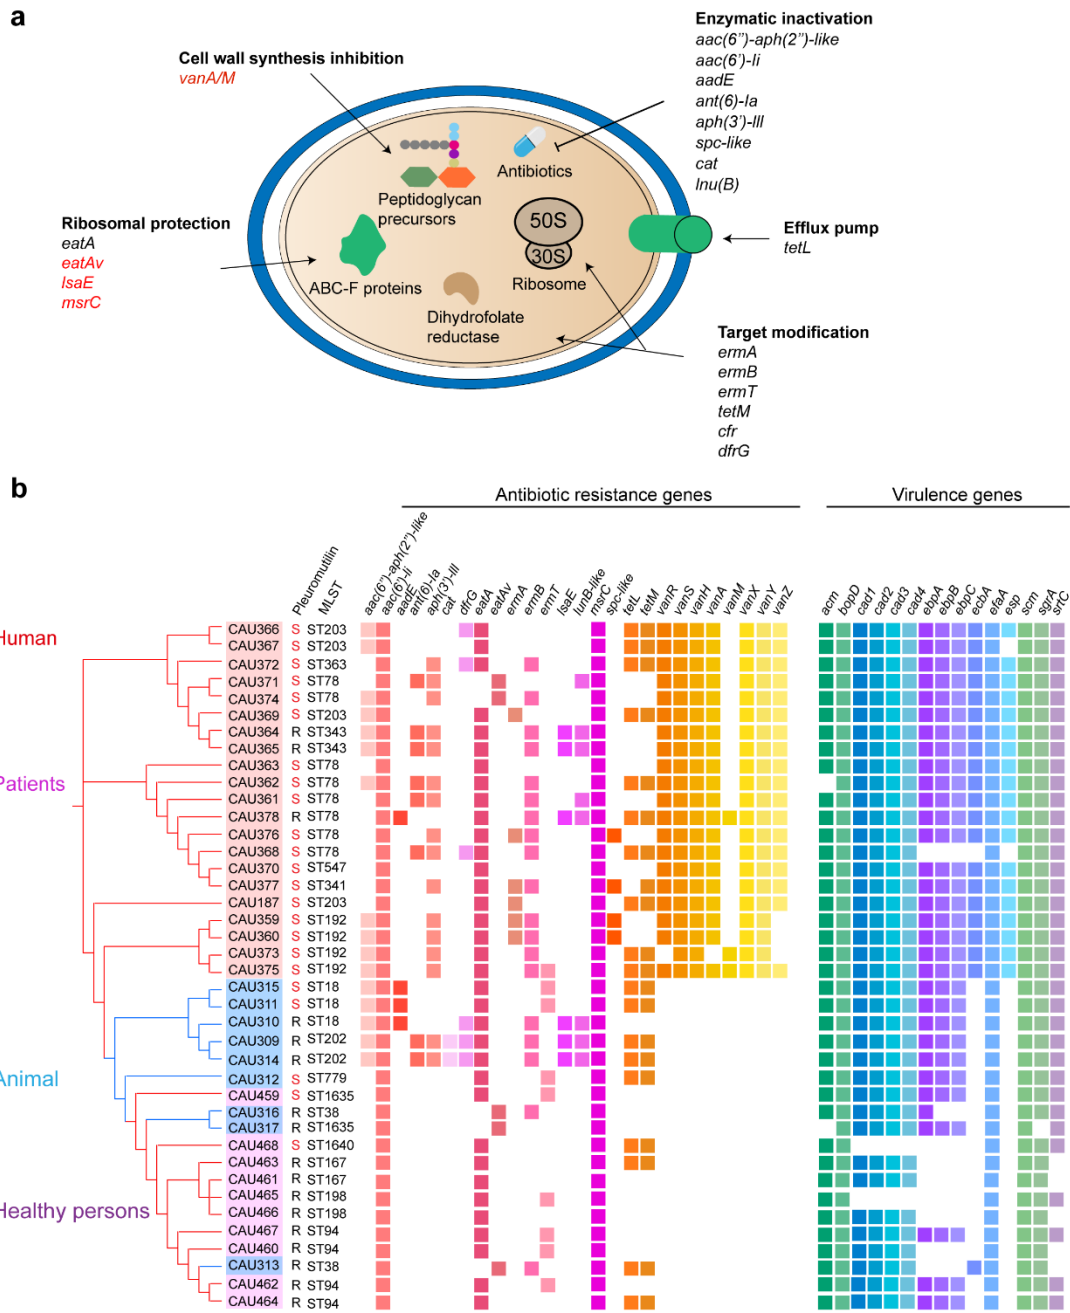

105

106 **Supplementary Fig. 6 Multiple resistance genes and virulence genes in *E.***  
 107 ***faecium* isolates**

108 (a) Scheme of mechanisms of resistance to antibiotics in *E. faecium*.

109 (b) Multiple resistance genes and virulence genes in 40 *E. faecium* isolates.

110 Phylogenetic tree of 40 *E. faecium* isolates of different origins was shown (Left). Red  
 111 “S” represents that isolates are sensitive to pleuromutilins, and black “R” represents  
 112 resistance. No *cfr* was found in these isolates.



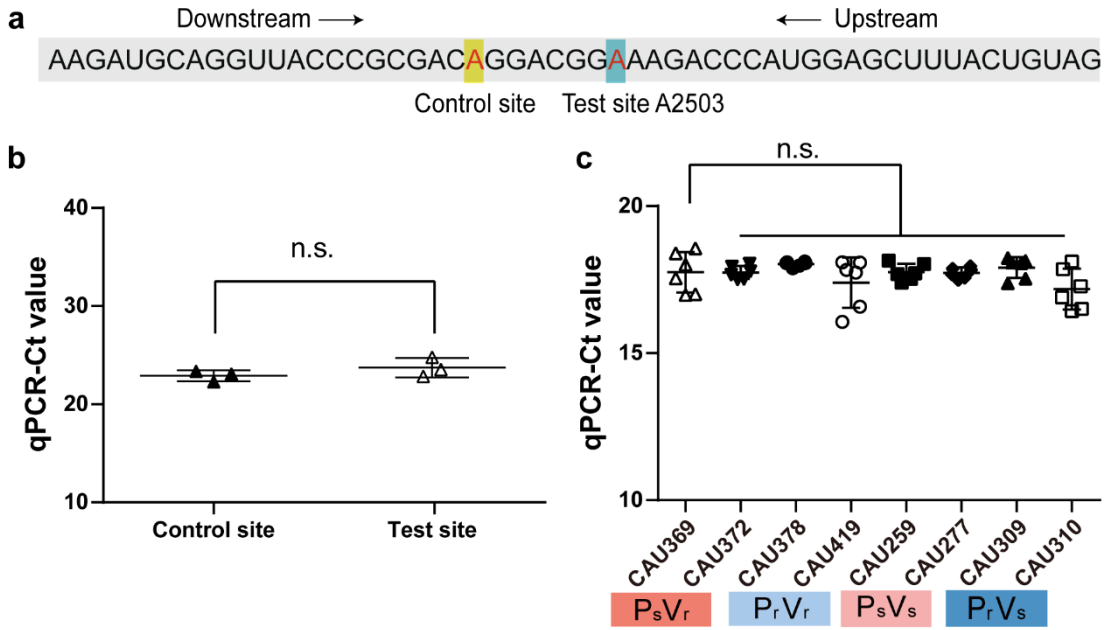

113

114 **Supplementary Fig. 7 No methylation on A2503 in *E. faecium*.**

115 **(a)** Locations of A2503 and control site in sequence of PTC.

116 **(b)** qPCR-Ct values of select m<sup>6</sup>A of control site and test site in VRE<sub>fm</sub> CAU369.

117 Control site was used as non-methylated negative controls compared with test site.

118 Test site is not methylated. All data are presented as mean ± S.D (n = 3).

119 **(c)** qPCR-Ct values of select m<sup>6</sup>A of test sites in four phenotypic isolates. A2503 site

120 in VRE<sub>fm</sub> CAU369 was used as non-methylated negative controls compared to other

121 isolates. All data are presented as mean ± S.D (n = 6).

122 P values were determined by non-parametric one-way ANOVA.

123

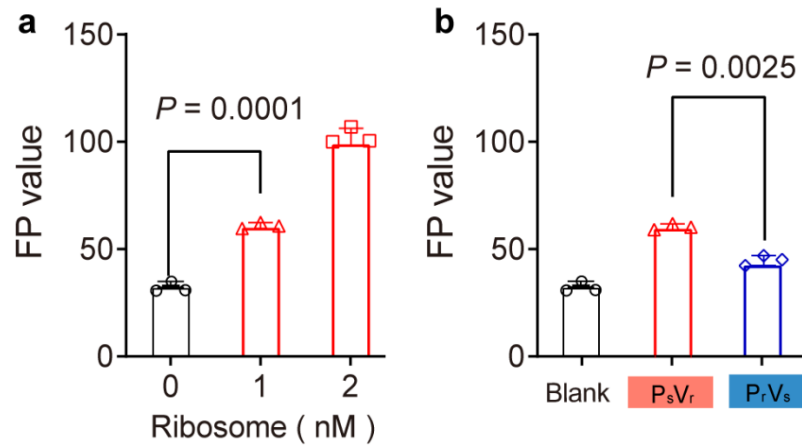

124

125 **Supplementary Fig. 8 Increased binding of pleuromutilins to ribosomes in  $P_sV_r$**   
 126  **$VRE_{fm}$ .**

127 (a) The fluorescence polarization values (FP value) between ribosomes of  $VRE_{fm}$   
 128 CAU369 and pleuromutilin-tracers (using 0.5  $\mu$ M VAL-DTAF as a model).

129 (b) FP values of 0.5  $\mu$ M pleuromutilin-tracers binding to the ribosomes (1 nM) of  
 130  $VRE_{fm}$  CAU369 or  $VSE_{fm}$  CAU310.

131 Experiments were performed as three biologically independent experiments, and the  
 132 mean  $\pm$  S.D. (n = 3) is shown.  $P$  values were determined by non-parametric one-way  
 133 ANOVA.

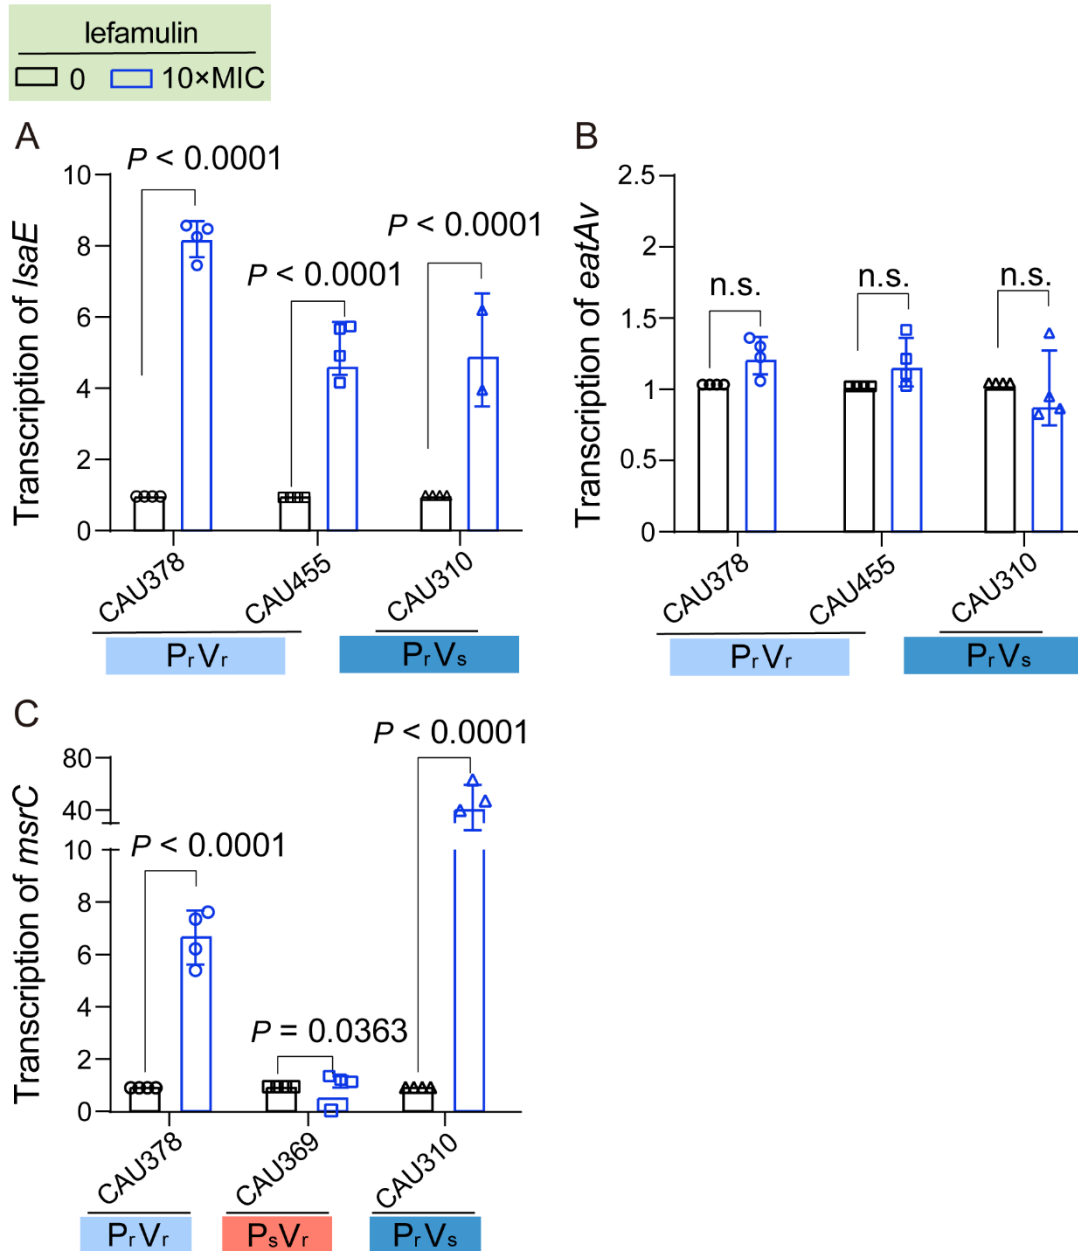

134

135 **Supplementary Fig. 9 Collateral sensitivity in P<sub>s</sub>V<sub>R</sub> VRE<sub>fm</sub> with decreased *msrC***  
 136 **transcription.**

137 (a-c) Transcription analysis of *lsaE* (a), *eatAv* (b) and *msrC* (c).

138 *E. faecium* isolates were treated with lefamulin (0.3 µg/mL) for 1 h.

139 Experiments were performed as three biologically independent experiments, and the

140 mean ± S.D. (n = 4) is shown. *P* values were determined by non-parametric one-way

141 ANOVA.

142

Pleuromutilin sensitive VRE<sub>fm</sub>

Pleuromutilin resistant VRE<sub>fm</sub>

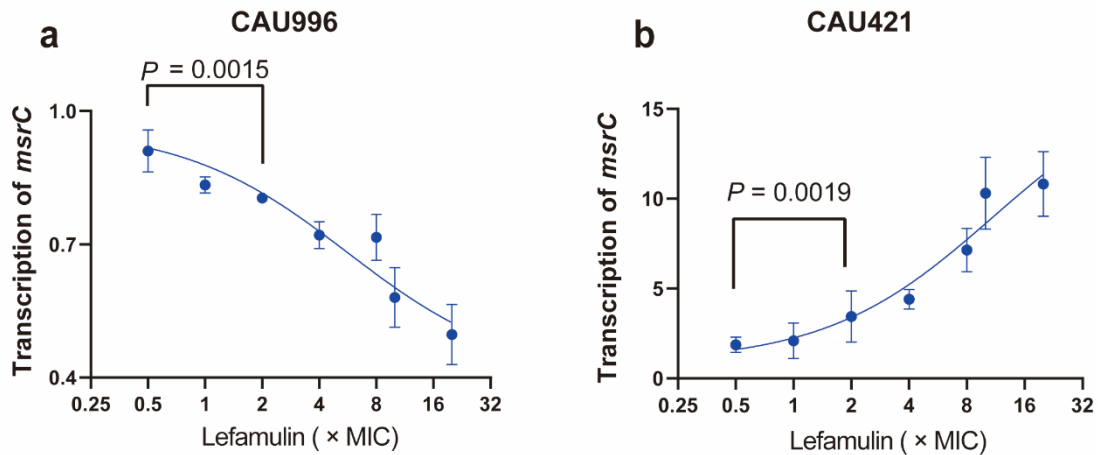

143

144 **Supplementary Fig. 10 Transcription of *msrC* in VRE<sub>fm</sub> in the presence of**  
145 **lefamulin.** Transcription analysis of *msrC* in the pleuromutilin sensitive isolate  
146 VRE<sub>fm</sub> CAU996 (a) and the resistant isolate VRE<sub>fm</sub> CAU421 (b). Both VRE<sub>fm</sub>  
147 isolates were treated with lefamulin for 1 h. Experiments were performed as three  
148 biologically independent experiments, and the mean ± S.D. (n = 3) were shown. *P*  
149 values were determined by non-parametric one-way ANOVA.

150

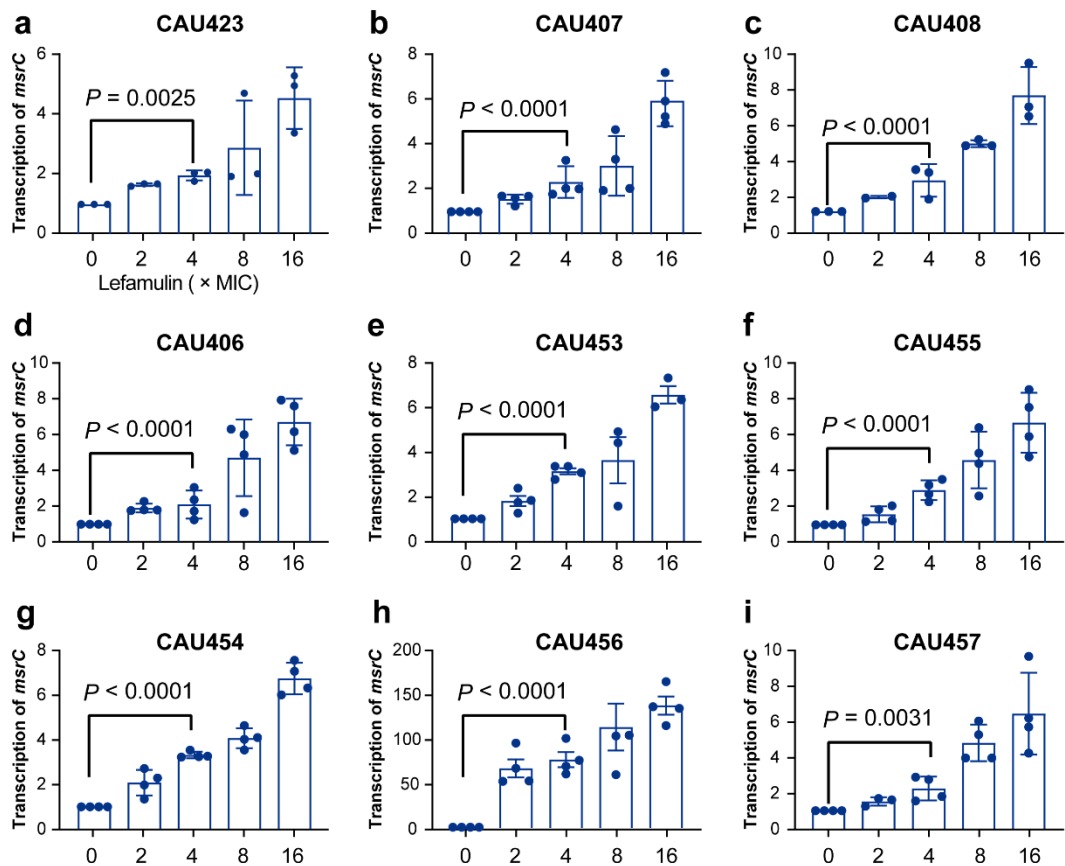

151

152 **Supplementary Fig. 11 Transcription of *msrC* in pleuromutilin resistant VRE<sub>fm</sub>**  
 153 **isolates increased in a dose-dependent manner.**

154 Transcription analysis of *msrC* in pleuromutilin resistant VRE<sub>fm</sub> isolates (a-i). VRE<sub>fm</sub>  
 155 isolates were treated with lefamulin for 1 h. Experiments were performed as three  
 156 biologically independent experiments, and the mean ± S.D. (n = 3) is shown. *P* values  
 157 were determined by non-parametric one-way ANOVA.

158

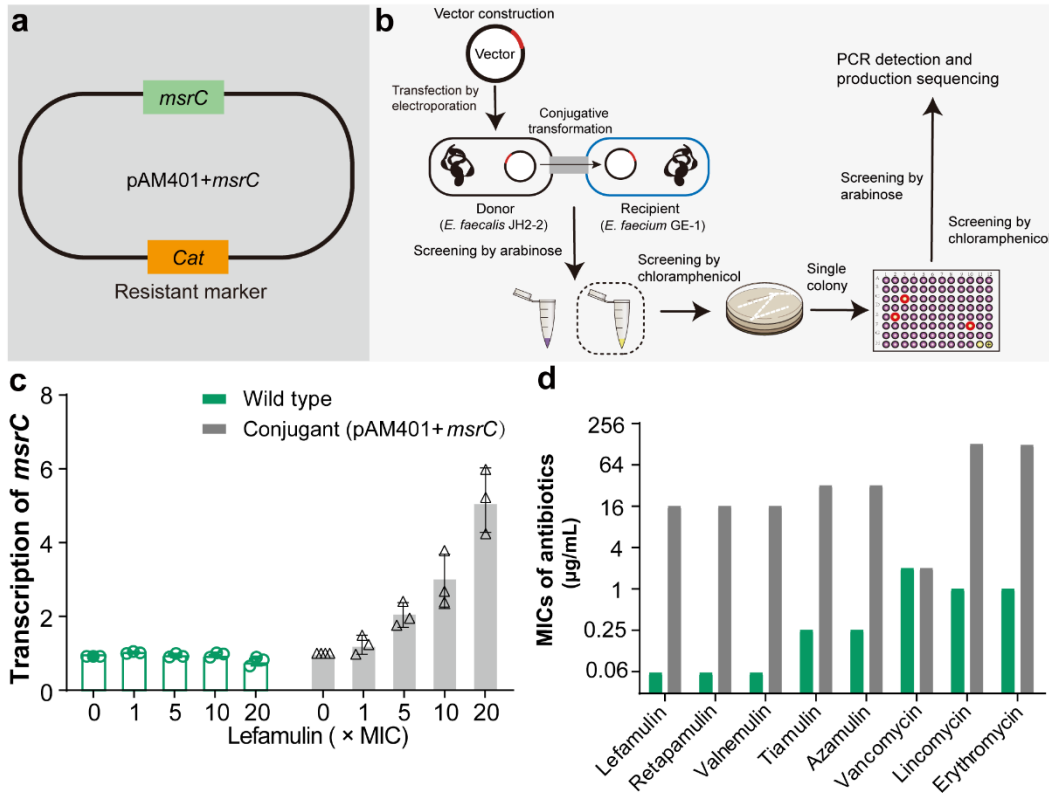

159

160 **Supplementary Fig. 12 The overexpression of *msrC* induces pleuromutilins**  
 161 **resistance.**

162 (a-b) Design of *msrC* expression plasmid (a) and scheme of transformation (b).

163 (c) The expression of *msrC* in the mutant (pAM401+ *msrC*) in the presence of a  
 164 concentration gradient of lefamulin. Experiments were performed as three  
 165 biologically independent experiments, and the mean  $\pm$  S.D. (n = 3) is shown.

166 (d) Comparison of antibiotic susceptibility in wild-type *E. faecium* and mutant.

167

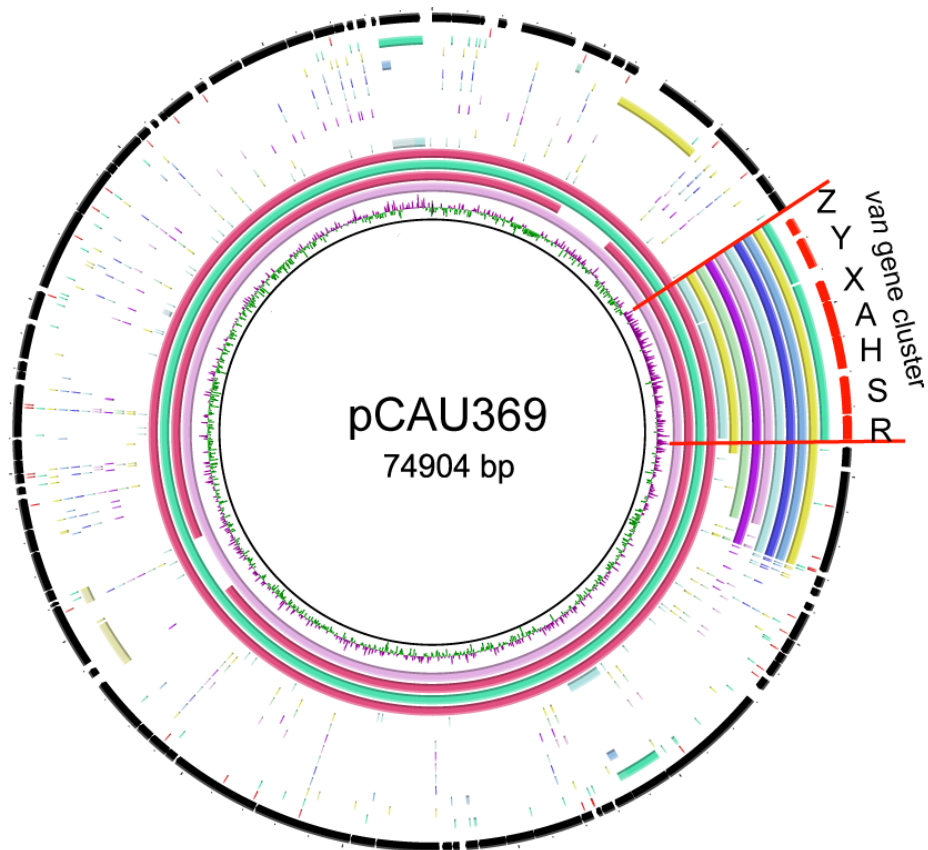

|                                   |                                       |                                     |                                 |
|-----------------------------------|---------------------------------------|-------------------------------------|---------------------------------|
| ■ pCAU369 (China)<br>SAMN18318802 | ■ pZB18 (Japan)<br>AB611033.1         | ■ pEA19081 (China)<br>NZ_KN880430.1 | ■ pEMA120 (China)<br>KX853854.1 |
| ■ pVRE (USA)<br>CP018072.1        | ■ pEFA-790c (USA)<br>NZ_CP025755.1    | ■ pIP816 (Norway)<br>NC_011140.1    | ■ pS177 (USA)<br>HQ115078.1     |
| ■ pVEF1 (Norway)<br>CP040742.1    | ■ pVEF3 (Norway)<br>AM931300          | ■ pVEF4 (Norway)<br>FN424376.1      | ■ pVRE1 (China)<br>CP040742.1   |
| ■ pVEF2 (Norway)<br>NC_008821.1   | ■ p2014-VREF-63 (Korea)<br>CP019989.1 |                                     |                                 |

168

169 **Supplementary Fig. 13 The *vanA* gene clusters in global plasmids.**

170 Locations of the *vanA* gene clusters are shown in 14 plasmids. The plasmid pCAU369  
 171 in VRE<sub>fm</sub> CAU369 shares the same sequence of the *vanA* gene cluster with that in the  
 172 other 13 global plasmids. The identities of the *vanA* genes are 100%.

173

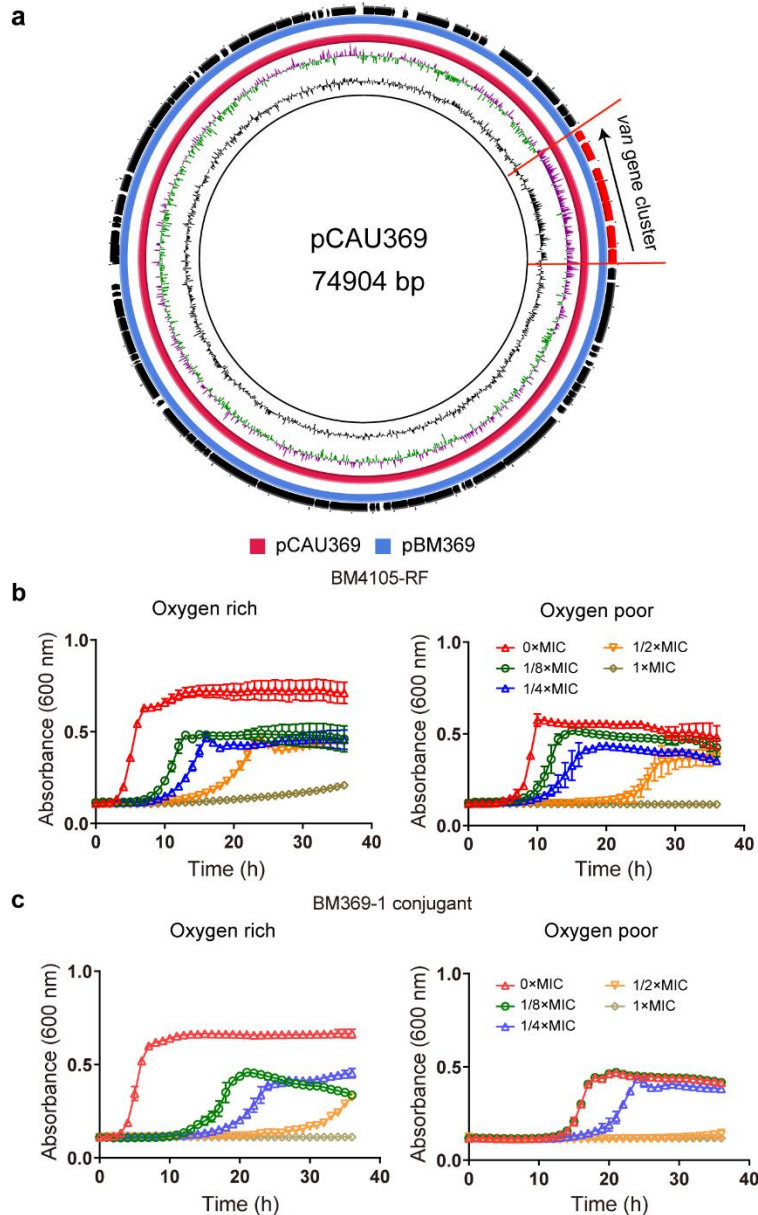

174

175 **Supplementary Fig. 14 Characterization of the conjugant with the plasmid**  
 176 **pCAU369.**

177 (a) High similarity between the plasmid pCAU369 and pBM369 in the conjugant.

178 pCAU369 is from VRE CAU369 (donor), pBM369 is from the conjugant BM369-1.

179 (b) Growth dynamics of *E. faecium* BM4105-RF (receptor) treated with sublethal  
 180 levels of lefamulin under oxygen rich (left) and poor (right) conditions.

181 (c) Growth dynamics of the conjugant *E. faecium* BM369-1 of *E. faecium* BM4105-  
 182 RF treated with sublethal levels of lefamulin under oxygen rich (left) and poor (right)  
 183 conditions.

184 Experiments were performed as three biologically independent experiments, and the  
 185 mean  $\pm$  S.D. (n = 3) is shown. *P* values were determined by non-parametric one-way  
 186 ANOVA.



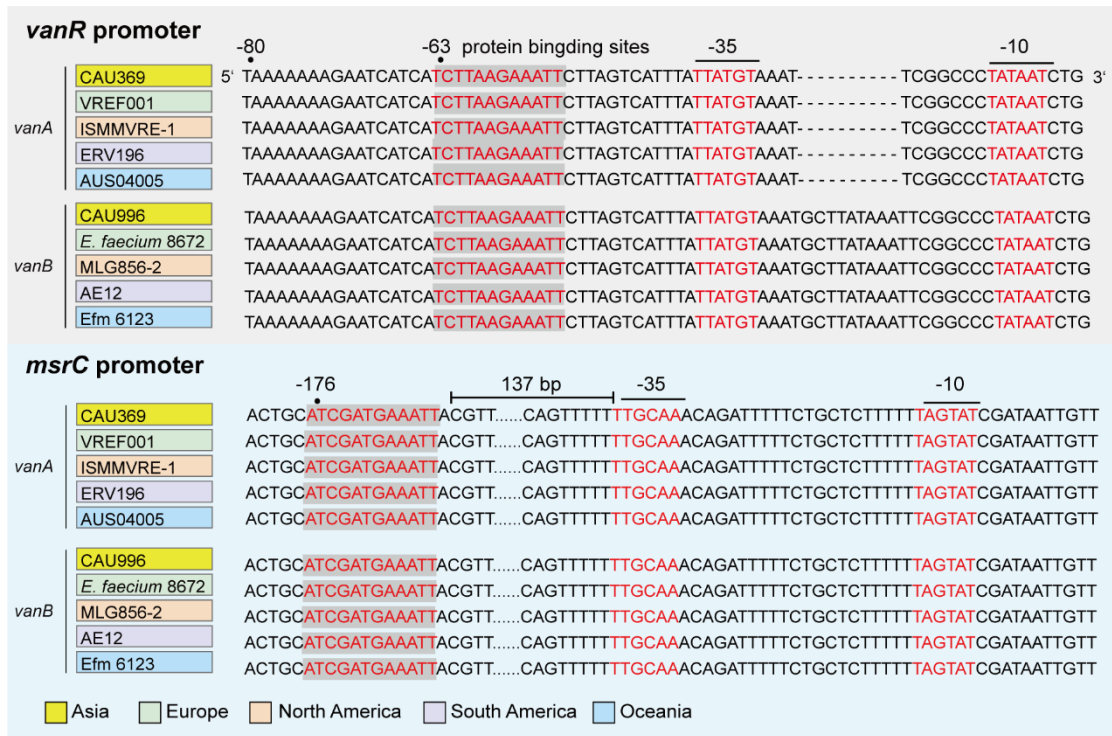

187  
188  
189  
190  
191  
192

**Supplementary Fig. 15** The *vanA* and *vanB* type *E. faecium* share the same patterns in the promoters of *msrC/vanR*. CAU369, VREF001, ISMMVRE-1, ERV196, and AUS04005 are *vanA* type isolates; CAU996, *E. faecium* 8672, MLG856-2, AE12, Efm 6123 are *vanB* type isolates.

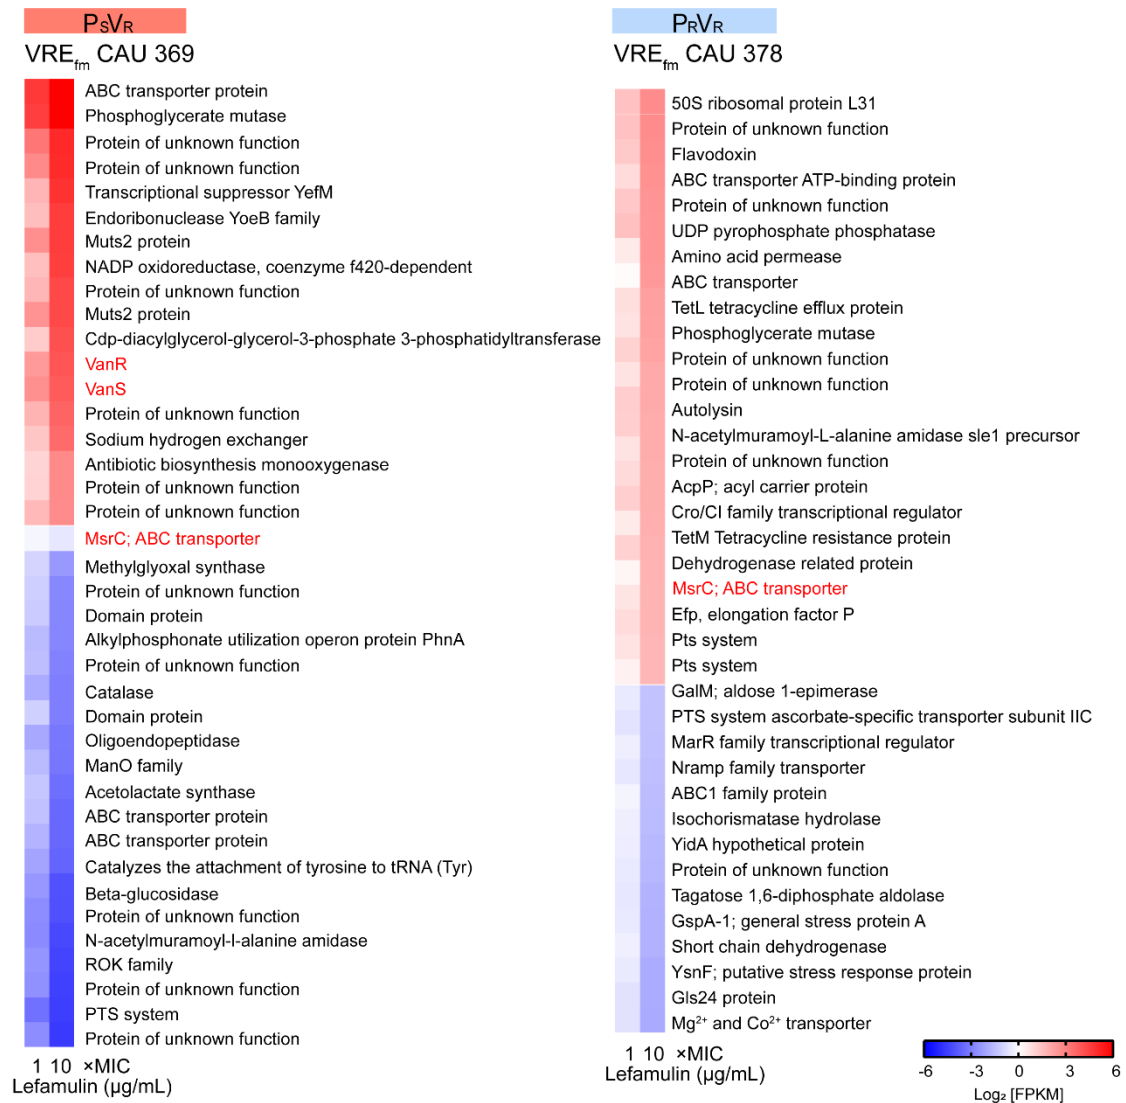

193

194 **Supplementary Fig. 16 Activation of *vanRS* in P<sub>s</sub>V<sub>r</sub> VRE<sub>fm</sub> with decreased *msrC***  
 195 **transcription.**

196 Transcriptome analysis of VRE<sub>fm</sub> CAU369 and CAU378 treated with 1× and 10×MIC  
 197 lefamulin for 1 h. Genes were identified as significantly different with fold changes of  
 198 log<sub>2</sub> [FPKM] values of at fold increase or fold decrease at expression levels. The top  
 199 20 genes changed were shown from the original 2,960 genes.

200 Experiments were performed as three biologically independent experiments, and the  
 201 mean ± S.D. (n = 3) is shown. *P* values were determined by non-parametric one-way  
 202 ANOVA.

203

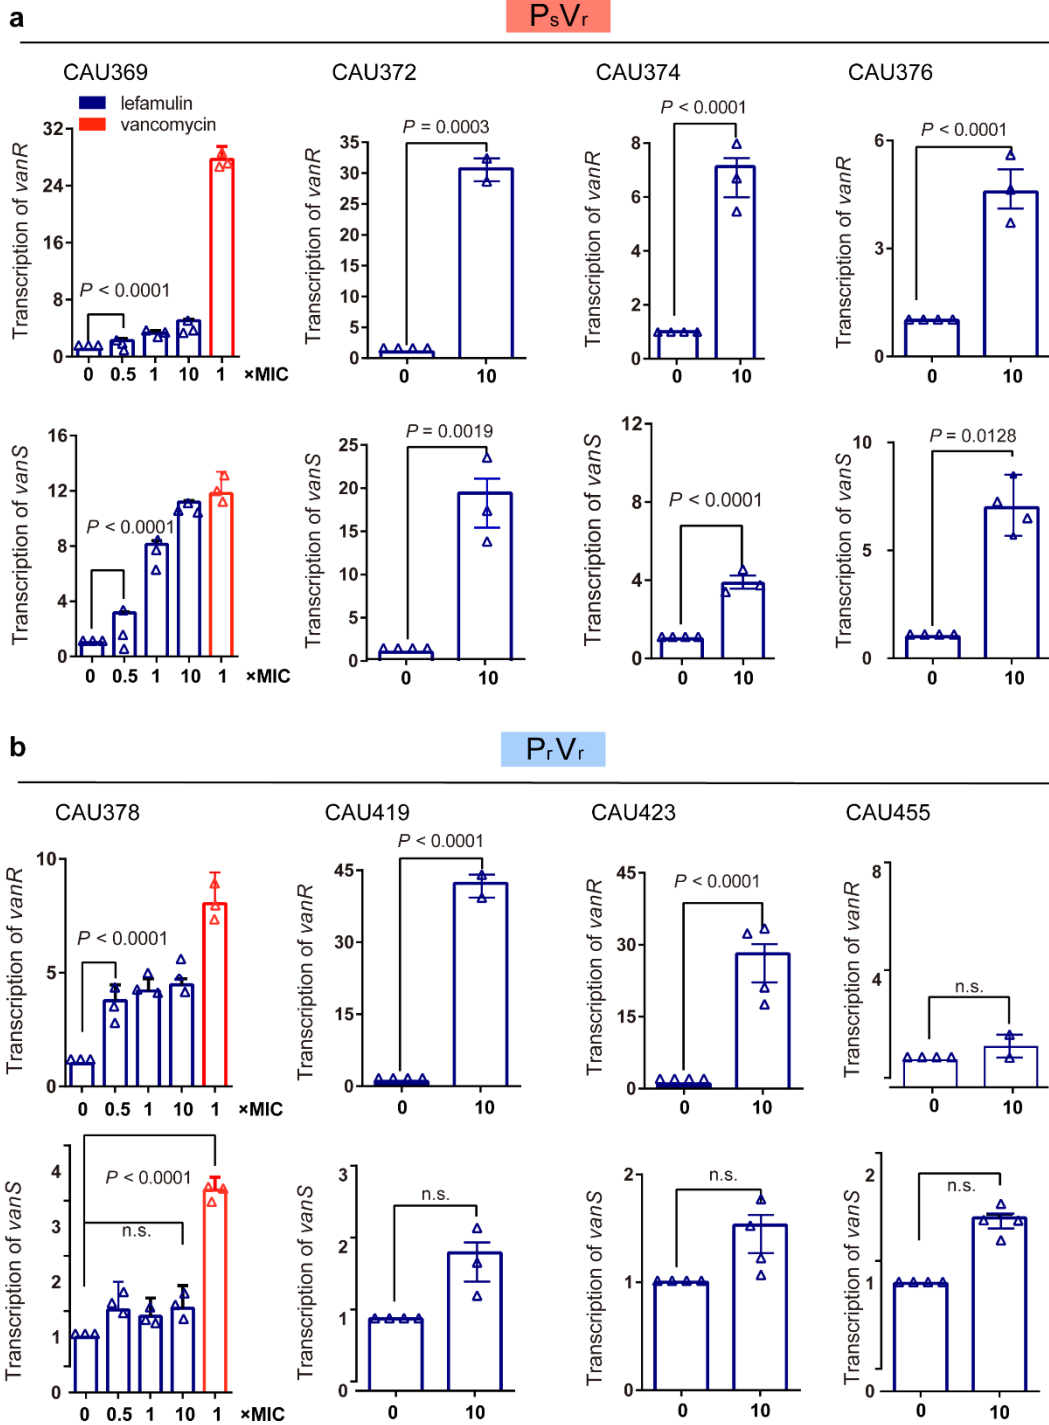

204

205 **Supplementary Fig. 17 Lefamulin induces activation of *vanR* and *vanS* in P<sub>s</sub>V<sub>r</sub>**  
 206 **isolates.**

207 **(a-b)** Transcript ratios of the *vanR/vanS* were quantified in diverse P<sub>s</sub>V<sub>r</sub> **(a)** and P<sub>r</sub>V<sub>r</sub>  
 208 **(b)** VRE<sub>fm</sub> isolates based on qRT-PCR analysis.

209 Experiments were performed as three biologically independent experiments, and the  
 210 mean ± S.D (n = 3). is shown. *P* values were determined by non-parametric one-way  
 211 ANOVA.

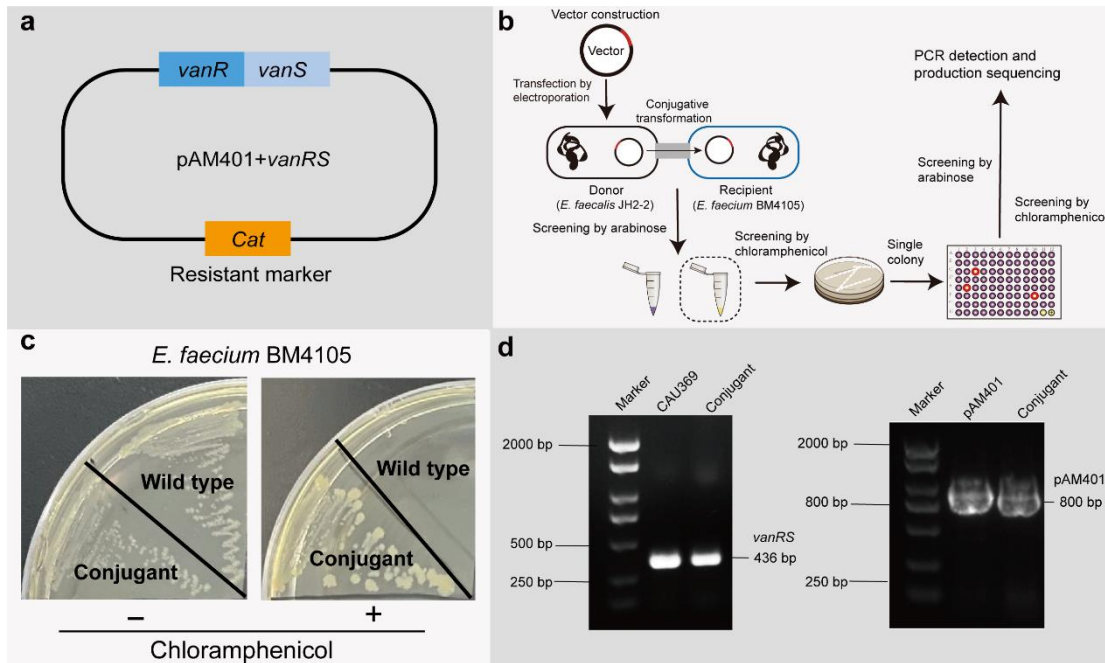

212

213 **Supplementary Fig. 18 Vector construction and transfection scheme.**

214 (a) Vector construction. Design of *vanRS* mutant plasmid.

215 (b) Transfection scheme of electroporation and conjugative transformation.

216 Conjugant-2 (pAM401+*vanRS*) was screened through this pathway.

217 (c) Screening the conjugant carrying pAM401+ *vanRS* plasmid in *E. faecium*. The  
218 conjugant shows chloramphenicol resistance.

219 (d) PCR amplification products of the conjugant. VRE<sub>fm</sub> CAU369 and pAM401 were  
220 used as controls. Experiments were performed as three biologically independent  
221 experiments  
222

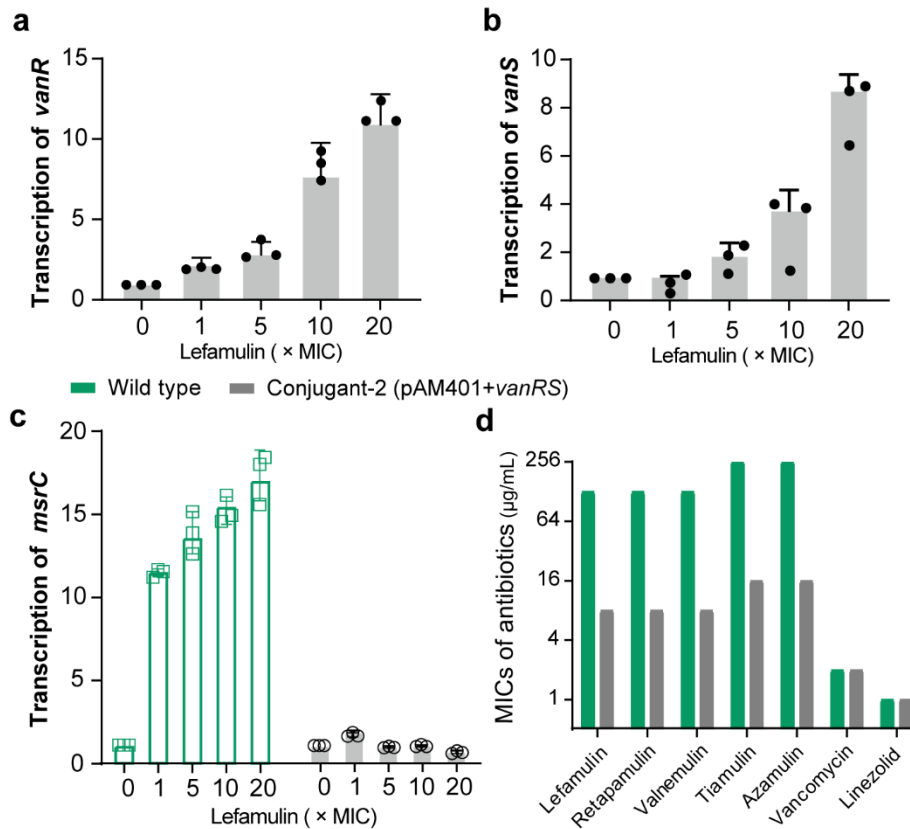

223

224

**Supplementary Fig. 19 The *vanRS* inhibits the transcription of *msrC*.**

225 (a-b) Transcription of *vanR* (a) and *vanS* (b) in the conjugant treated with lefamulin.

226 (c) Comparison of *msrC* transcription in wild type *E. faecium* and conjugant in the  
 227 presence of lefamulin. Experiments were performed as three biologically independent  
 228 experiments, and the mean ± S.D. (n = 3) is shown.

229 (d) Comparison of the MICs of multiple antibiotics in wild type *E. faecium* and  
 230 conjugant. Vancomycin and linezolid were used as controls.

231

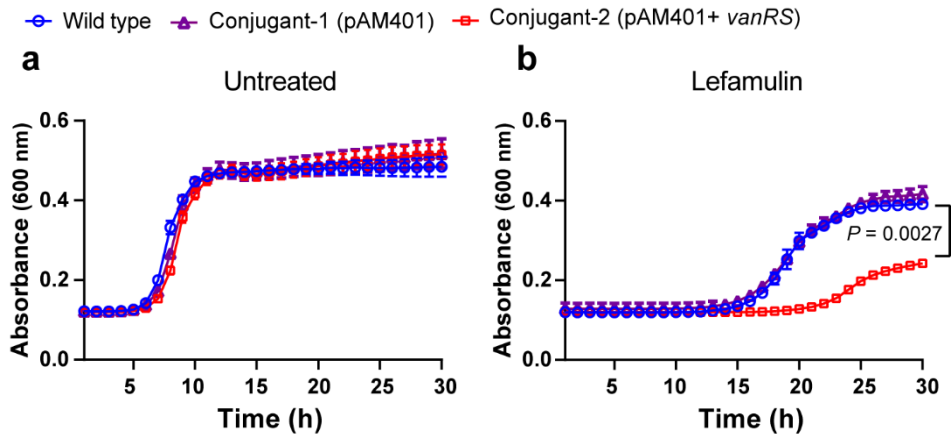

232

233 **Supplementary Fig. 20 Lefamulin inhibits the growth of the conjugant carrying**  
 234 ***vanRS*.**

235 Growth curves of wild type *E. faecium* and conjugants treated with a sublethal level of  
 236 lefamulin (1/2 MIC). Conjugant-1 receives sole plasmid pAM401, whereas

237 Conjugant-2 receives the plasmid pAM401+*vanRS*.

238 Experiments were performed as three biologically independent experiments, and the  
 239 mean  $\pm$  S.D. (n = 3) were shown. *P* values were determined by non-parametric one-  
 240 way ANOVA.

241

242

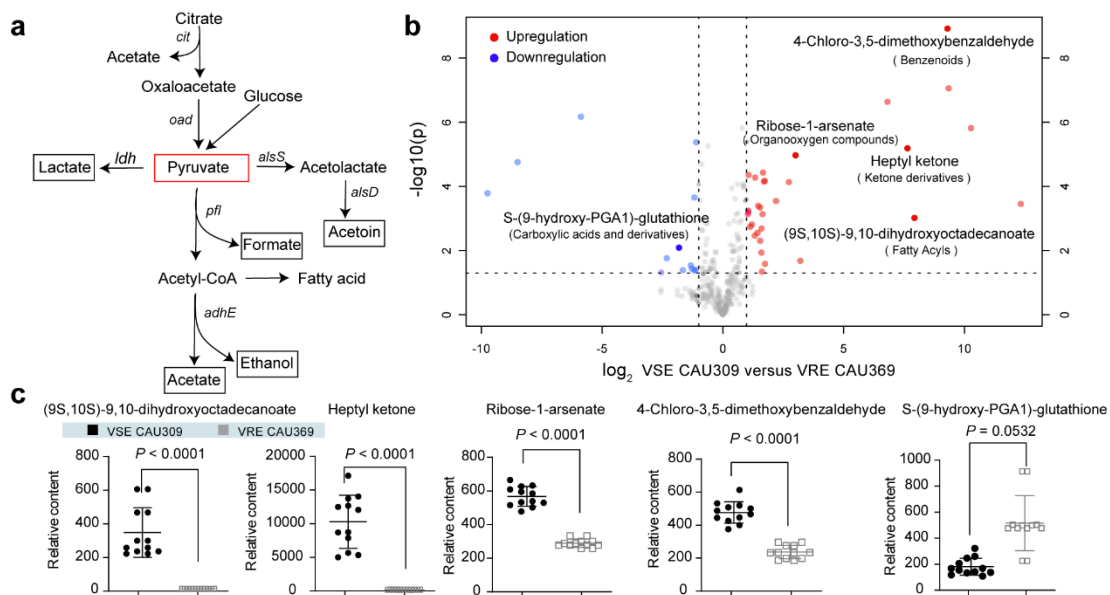

243

244 **Supplementary Fig. 21 Pyruvate metabolism in *E. faecium*.**

245 (a) Scheme of pyruvate metabolism in *E. faecium*, according to the reference<sup>2</sup>. Major  
 246 end-products are boxed. Genes of *E. faecium* encoding the synthesis of enzymes are  
 247 shown as follows: *cit*, citrate lyase; *oad*, oxaloacetate decarboxylase; *ldh* L- (+) -  
 248 lactate dehydrogenase; *alsS*,  $\alpha$ -acetolactate synthase; *alsD*,  $\alpha$ -acetolactate  
 249 decarboxylase; *pfl*, pyruvate formate-lyase; *adhE*, aldehyde-alcohol dehydrogenase.  
 250 (b) Volcano plot showing the metabolites in VRE<sub>fm</sub> CAU369 and VSE<sub>fm</sub> CAU309.  
 251 (c) Comparison of five major metabolites in VRE<sub>fm</sub> CAU369 and VSE<sub>fm</sub> CAU309.  
 252 All data are presented as mean  $\pm$  S.D. (n = 12 biological replicates). *P* values were  
 253 determined by non-parametric one-way ANOVA.

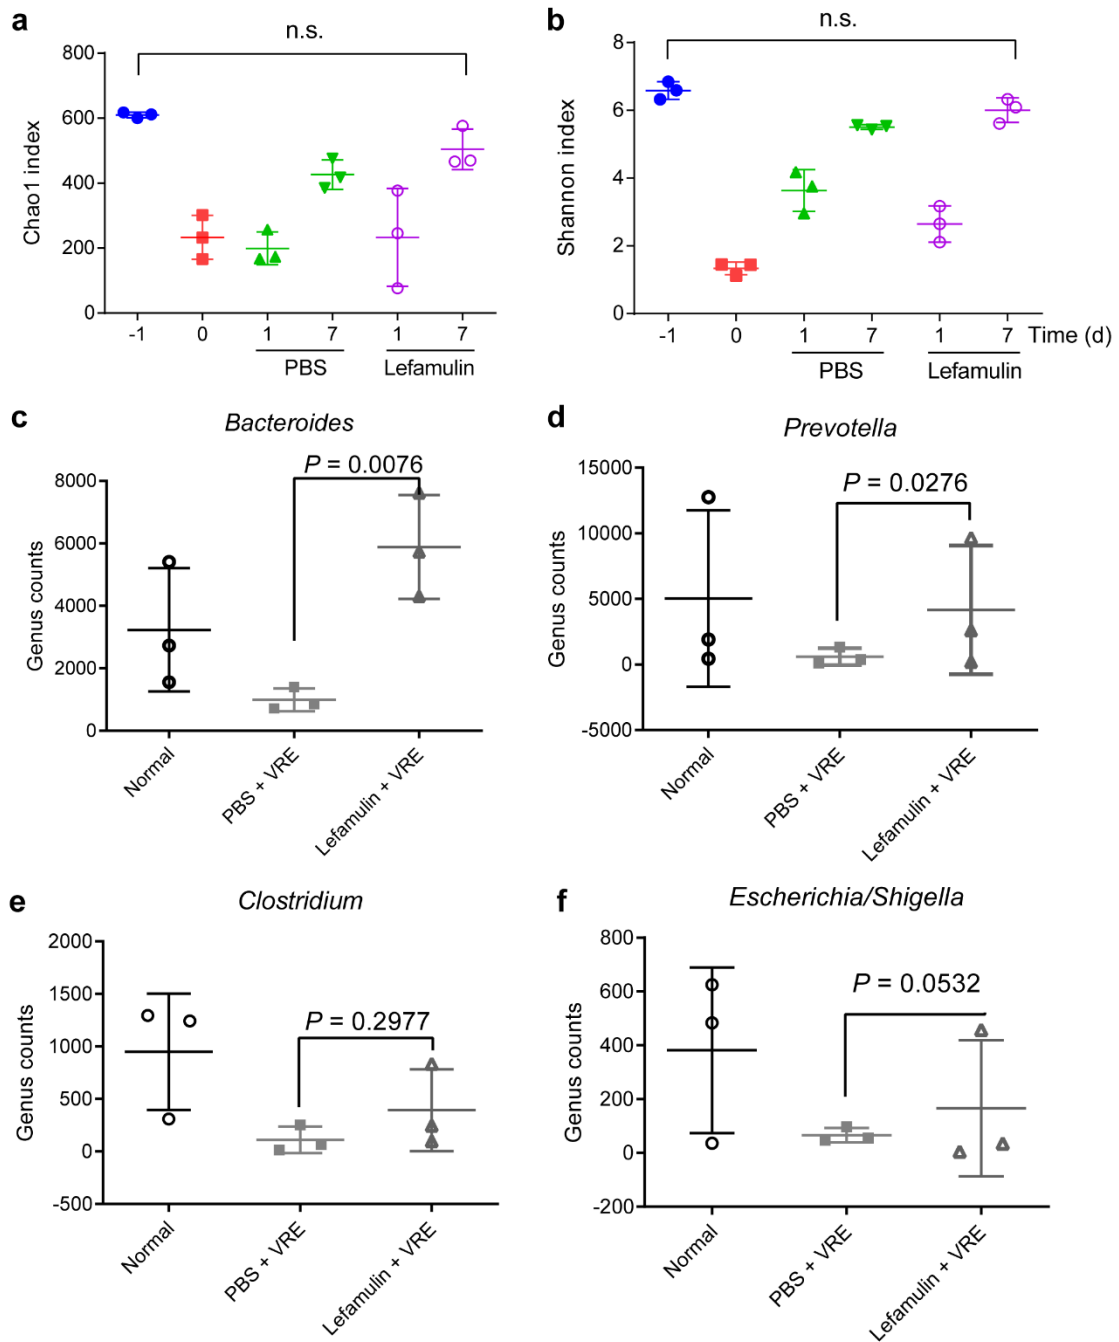

254

255 **Supplementary Fig. 22 Lefamulin restores the homeostasis of intestinal flora.**

256 (a-b) The Chao1 index (a) and Shannon index (b) of intestinal microbiota.  
 257 (c-f) Genus counts in the mouse intestine. *Bacteroides* (c) *Prevotella* (d) *Clostridium*  
 258 (e) and *Escherichia/Shigella* (f) in the mice treated with lefamulin restored faster than  
 259 that with PBS after expansion of VRE<sub>fm</sub> CAU369 at the 7th day.

260 Experiments were performed as three biologically independent experiments, and the  
 261 mean  $\pm$  S.D. is shown.  $P$  values were determined by non-parametric one-way  
 262 ANOVA.

263



264  
265

**Supplementary Table 1 Antibacterial activity and collateral sensitivity in *E. faecium* (n = 210).**

| Class          | Antibacterial agent | MIC <sub>50</sub> |                  | RR     | Target                |
|----------------|---------------------|-------------------|------------------|--------|-----------------------|
|                |                     | VRE<br>(n = 101)  | VSE<br>(n = 109) |        |                       |
| Aminoglycoside | Gentamicin          | >128              | 32               | 8      | Ribosome, 30S         |
| Amphenicol     | Chloramphenicol*    | 32                | 8                | 4      | Ribosome, 50S         |
| β-lactam       | Ampicillin          | >128              | 2                | 64     | PBP                   |
|                | Cefoxitin           | >128              | 64               | 2      |                       |
|                | Meropenem           | >128              | 16               | 8      |                       |
| Glycopeptide   | Vancomycin          | >128              | 2                | 64     | D-Ala-D-Ala dipeptide |
| Lincosamide    | Clindamycin         | >128              | 4                | 16     | Ribosome, 50S         |
| Macrolide      | Erythromycin        | 16                | 8                | 2      | Ribosome, 50S         |
| Oxazolidone    | Linezolid           | 4                 | 4                | 1      | Ribosome, 50S         |
| Pleuromutilin  | Azamulin            | 0.5               | >16              | 0.0312 | Ribosome, 50S         |
|                | Lefamulin           | 0.06              | >16              | 0.0037 |                       |
|                | Retapamulin         | 0.03              | >16              | 0.0019 |                       |
|                | Tiamulin            | 0.5               | >16              | 0.0312 |                       |
|                | Valnemulin          | 0.03              | >16              | 0.0019 |                       |
| Quinolone      | Ciprofloxacin       | >64               | 2                | 32     | DNA gyrase            |
| Rifamycin      | Rifampicin          | 8                 | 4                | 2      | RNA polymerase        |
| Streptogramin  | Virginiamycin M1*   | 2                 | 4                | 0.5    | Ribosome, 50S         |
| Tetracycline   | Tetracycline        | 2                 | 4                | 0.5    | Ribosome, 30S         |

266  
267

\*Note: The MIC<sub>50</sub> of chloramphenicol and virginiamycin M1 were calculated with 40 isolates.

Supplementary Table 2 MICs of multiple classes of antibiotics in 40 *E. faecium* ( $\mu\text{g/mL}$ ).

|                  | Isolates | AMP  | CIP | CLI   | CRO  | ERY   | GEN  | LZD  | MEM   | LMU   | RIF    | TET   | VAN  |
|------------------|----------|------|-----|-------|------|-------|------|------|-------|-------|--------|-------|------|
|                  | CAU309   | 128  | 128 | 128   | 128  | 128   | 128  | 4    | 128   | 16    | 16     | 16    | 2    |
|                  | CAU310   | 128  | 128 | 64    | 128  | 128   | 128  | 2    | 128   | 16    | 8      | 1     | 2    |
|                  | CAU273   | 1    | 0.5 | 0.5   | 64   | 8     | 16   | 2    | 8     | 16    | 16     | 0.5   | 2    |
|                  | CAU274   | 2    | 2   | 4     | 128  | 4     | 16   | 4    | 16    | 16    | 16     | 1     | 2    |
|                  | CAU311   | 128  | 128 | 128   | 128  | 128   | 128  | 4    | 128   | 0.125 | 4      | 16    | 1    |
|                  | CAU312   | 4    | 4   | 0.25  | 128  | 128   | 32   | 2    | 16    | 0.03  | 16     | 16    | 1    |
|                  | CAU313   | 2    | 2   | 128   | 128  | 128   | 16   | 4    | 16    | 16    | 4      | 16    | 1    |
|                  | CAU275   | 4    | 2   | 4     | 64   | 8     | 16   | 4    | 16    | 16    | 8      | 0.5   | 2    |
|                  | CAU314   | 128  | 128 | 128   | 128  | 128   | 128  | 4    | 128   | 16    | 16     | 16    | 2    |
| VSE <sub>m</sub> | CAU276   | 8    | 16  | 32    | 128  | 16    | 8    | 4    | 16    | 16    | 0.25   | 4     | 2    |
|                  | CAU315   | 128  | 128 | 128   | 128  | 128   | 128  | 2    | 128   | 0.125 | 4      | 16    | 2    |
|                  | CAU316   | 4    | 16  | 128   | 128  | 128   | 128  | 4    | 16    | 16    | 0.25   | 4     | 1    |
|                  | CAU277   | 4    | 0.3 | 0.25  | 128  | 8     | 0.25 | 0.25 | 16    | 0.03  | 0.25   | 1     | 2    |
|                  | CAU278   | 2    | 2   | 4     | 128  | 4     | 16   | 4    | 16    | 16    | 4      | 0.5   | 1    |
|                  | CAU279   | 4    | 4   | 64    | 128  | 32    | 32   | 4    | 32    | 16    | 16     | 0.25  | 2    |
|                  | CAU280   | 2    | 1   | 8     | 8    | 16    | 16   | 2    | 16    | 16    | 32     | 2     | 1    |
|                  | CAU281   | 0.25 | 1   | 1     | 4    | 2     | 32   | 1    | 0.25  | 16    | 4      | 0.25  | 1    |
|                  | CAU317   | 2    | 1   | 64    | 128  | 16    | 2    | 4    | 16    | 16    | 64     | 4     | 1    |
|                  | CAU282   | 4    | 16  | 32    | 128  | 32    | 8    | 4    | 32    | 16    | 16     | 0.25  | 2    |
|                  | CAU359   | >128 | >64 | >128  | >128 | >128  | 32   | 2    | >128  | 0.06  | 16     | 0.5   | >128 |
|                  | CAU360   | >128 | >64 | >128  | >128 | >128  | >128 | 2    | >128  | 0.12  | 16     | 0.5   | >128 |
|                  | CAU187   | >128 | >64 | <0.25 | >128 | >128  | 16   | 2    | >128  | 0.06  | 4      | 32    | >128 |
|                  | CAU361   | >128 | >64 | >128  | >128 | >128  | 8    | 2    | >128  | <0.03 | <0.25  | <0.25 | >128 |
|                  | CAU362   | >128 | >64 | >128  | >128 | >128  | >128 | 4    | >128  | 0.03  | 8      | 1     | >128 |
|                  | CAU363   | >128 | >64 | <0.25 | >128 | <0.25 | 128  | 1    | >128  | <0.03 | 1      | <0.25 | >128 |
|                  | CAU364   | >128 | >64 | >128  | >128 | >128  | >128 | 4    | >128  | 2     | 4      | 0.5   | >128 |
|                  | CAU365   | >128 | 64  | >128  | >128 | >128  | >128 | 2    | >128  | 2     | 2      | 0.5   | >128 |
|                  | CAU366   | >128 | 64  | <0.25 | >128 | <0.25 | >128 | 2    | >128  | 0.25  | 4      | 32    | >128 |
|                  | CAU367   | >128 | >64 | <0.25 | >128 | <0.25 | >128 | 2    | >128  | 0.12  | 4      | 32    | >128 |
| VRE <sub>m</sub> | CAU368   | >128 | >64 | >128  | 16   | >128  | >128 | 2    | <0.25 | <0.03 | 8      | 32    | >128 |
|                  | CAU369   | >128 | >64 | >128  | >128 | >128  | >128 | 2    | >128  | <0.03 | 4      | 2     | >128 |
|                  | CAU370   | >128 | >64 | <0.25 | >128 | 8     | 16   | 2    | >128  | 0.03  | 2      | 1     | >128 |
|                  | CAU371   | >128 | >64 | >128  | >128 | >128  | 16   | 2    | >128  | <0.03 | 8      | <0.25 | >128 |
|                  | CAU372   | >128 | >64 | >128  | >128 | >128  | 16   | 2    | >128  | <0.03 | 4      | 32    | >128 |
|                  | CAU373   | >128 | >64 | >128  | >128 | >128  | >128 | 2    | >128  | <0.03 | 4      | 32    | >128 |
|                  | CAU374   | >128 | >64 | >128  | >128 | 64    | >128 | 1    | >128  | 0.12  | <0.125 | <0.25 | >128 |
|                  | CAU375   | >128 | >64 | >128  | >128 | >128  | >128 | 2    | >128  | 0.03  | 4      | 32    | >128 |
|                  | CAU376   | >128 | >64 | >128  | >128 | >128  | >128 | 1    | >128  | <0.03 | 4      | <0.25 | >128 |
|                  | CAU377   | >128 | >64 | >128  | >128 | >128  | 32   | 2    | >128  | 0.12  | 4      | 16    | >128 |
|                  | CAU378   | >128 | >64 | >128  | >128 | >128  | 16   | 2    | >128  | >16   | 4      | 32    | >128 |

269 Note: AMP: Ampicillin; CIP: Ciprofloxacin; CLI: Clindamycin; CRO: Ceftriaxone; ERY:  
270 Erythromycin; GEN: Gentamicin; LZD: Linezolid; MEM: RET: Retapamulin; RIF: Rifampicin; TET:  
271 Tetracycline; VAN: Vancomycin.

**Supplementary Table 3 Information about VRE<sub>fm</sub> isolates worldwide.**

| Accession ID<br>(Bio sample) | Strain   | Source         | Accession ID<br>(Bio sample) | Strain   | Source            |          |
|------------------------------|----------|----------------|------------------------------|----------|-------------------|----------|
| 1                            | 14694313 | CAU187         | 41                           | 4397503  | 805447/07         |          |
| 2                            | 14693177 | CAU 359        | 42                           | 6330395  | LIM1590           |          |
| 3                            | 14693178 | CAU 360        | 43                           | 6555613  | LIM695            | Brazil   |
| 4                            | 14687682 | CAU 361        | 44                           | 6555612  | LIM559            |          |
| 5                            | 14693732 | CAU 362        | 45                           | 5461961  | ERV196            |          |
| 6                            | 14693733 | CAU 363        | 46                           | 5461954  | ERV157            |          |
| 7                            | 14693734 | CAU 364        | 47                           | 5461957  | ERV175            | Colombia |
| 8                            | 14694296 | CAU 365        | 48                           | 5461978  | ERV98             |          |
| 9                            | 14694297 | CAU 366        | 49                           | 5461977  | ERV35             |          |
| 10                           | 14694298 | CAU 367        | 50                           | 5461976  | ERV34             |          |
| 11                           | 14694299 | CAU 368        | 51                           | 5461958  | ERV177            | Colombia |
| 12                           | 14694301 | CAU 369        | 52                           | 6621457  | CFSAN059071       | Denmark  |
| 13                           | 14694302 | CAU 370        | 53                           | 6111320  | GER_10_Efcm_HA-DE | Germany  |
| 14                           | 14694303 | CAU 371        | 54                           | 6111319  | 9_Efcm_HA-DE      |          |
| 15                           | 14694304 | CAU 372        | 55                           | 6463381  | 2014-VREF-114     | Korea    |
| 16                           | 14694306 | CAU 373        | 56                           | 6472829  | 2014-VREF-63      |          |
| 17                           | 14694307 | CAU 374        | 57                           | 4500826  | VREr7             |          |
| 18                           | 14694308 | CAU 375        | 58                           | 4500822  | VREr6             | Malaysia |
| 19                           | 14694309 | CAU 376        | 59                           | 6885147  | VREr5             |          |
| 20                           | 14694310 | CAU 377        | 60                           | 4500812  | VRE2              |          |
| 21                           | 14694311 | CAU 378        | 61                           | 5461973  | MAL_ERV279        | Mexico   |
| 22                           | 3988550  | ISMMS_VRE_2    | 62                           | 5461972  | Y_MAL_ERV275      |          |
| 23                           | 3988560  | ISMMS_VRE_5    | 63                           | 10248949 | EF_386            |          |
| 24                           | 3988561  | ISMMS_VRE_6    | 64                           | 10249139 | EF_367            |          |
| 25                           | 3988626  | ISMMS_VRE_8    | 65                           | 10249219 | EF_181            |          |
| 26                           | 7274322  | VRE2014-195    | 66                           | 10248944 | PAK_EF_048        | Pakistan |
| 27                           | 7274321  | VRE2014-7      | 67                           | 10249011 | PAK_EF_042        |          |
| 28                           | 7274325  | VRE2016-194    | 68                           | 10248976 | PAK_EF_034        |          |
| 29                           | 7274324  | VRE2016-78     | 69                           | 10249190 | EF_033            |          |
| 30                           | 3198116  | 909_EFCM       | 70                           | 10248976 | EF_028            |          |
| 31                           | 3197807  | 607_EFCM       | 71                           | 10249104 | EF_006            |          |
| 32                           | 3197907  | 702_EFCM       | 72                           | 4270932  | SDW_VRE-1400294   |          |
| 33                           | 3197760  | 560_EFCM       | 73                           | 4270930  | VRE-1300937       |          |
| 34                           | 3197708  | 514_EFCM       | 74                           | 4270929  | VRE-1300911       |          |
| 35                           | 3197623  | 43_EFCM        | 75                           | 4270928  | VRE-1300900       | Sweden   |
| 36                           | 3197600  | 41_EFCM        | 76                           | 4270927  | VRE-1300899       |          |
| 37                           | 3197568  | 377_EFCM       | 77                           | 4270926  | VRE-1300578       |          |
| 38                           | 3197342  | 152_EFCM       | 78                           | 4270925  | VRE-1300518       |          |
| 39                           | 8595978  | AUSMDU00004055 | 79                           | 8196783  | UK_VREF003        | U.K.     |
| 40                           | 10273305 | RBWH1          |                              |          |                   |          |

**Supplementary Table 4 Key nucleotides of 23S rRNA related to pleuromutilins resistance in 40 *E. faecium* isolates.**

| Isolates                       | Copies of 23S rRNA | PLEs* | 23S rRNA nucleotides |       |       |       |       |       |       |       |
|--------------------------------|--------------------|-------|----------------------|-------|-------|-------|-------|-------|-------|-------|
|                                |                    |       | G2061                | A2062 | C2452 | A2503 | U2504 | G2505 | U2506 | U2585 |
| CAU273                         | 1                  | R     | G                    | A     | C     | A     | U     | G     | U     | U     |
| CAU274                         | 1                  | R     | G                    | A     | C     | A     | U     | G     | U     | U     |
| CAU275                         | 1                  | R     | G                    | A     | C     | A     | U     | G     | U     | U     |
| CAU276                         | 1                  | R     | G                    | A     | C     | A     | U     | G     | U     | U     |
| CAU277                         | 1                  | S     | G                    | A     | C     | A     | U     | G     | U     | U     |
| CAU278                         | 1                  | R     | G                    | A     | C     | A     | U     | G     | U     | U     |
| CAU279                         | 1                  | R     | G                    | A     | C     | A     | U     | G     | U     | U     |
| CAU280                         | 1                  | R     | G                    | A     | C     | A     | U     | G     | U     | U     |
| CAU281                         | 1                  | R     | G                    | A     | C     | A     | U     | G     | U     | U     |
| <b>VSE<sub>fm</sub></b> CAU282 | 1                  | R     | G                    | A     | C     | A     | U     | G     | U     | U     |
| CAU309                         | 1                  | R     | G                    | A     | C     | A     | U     | G     | U     | U     |
| CAU310                         | 1                  | R     | G                    | A     | C     | A     | U     | G     | U     | U     |
| CAU311                         | 1                  | S     | G                    | A     | C     | A     | U     | G     | U     | U     |
| CAU312                         | 1                  | S     | G                    | A     | C     | A     | U     | G     | U     | U     |
| CAU313                         | 1                  | S     | G                    | A     | C     | A     | U     | G     | U     | U     |
| CAU314                         | 1                  | R     | G                    | A     | C     | A     | U     | G     | U     | U     |
| CAU315                         | 1                  | S     | G                    | A     | C     | A     | U     | G     | U     | U     |
| CAU316                         | 1                  | R     | G                    | A     | C     | A     | U     | G     | U     | U     |
| CAU317                         | 1                  | R     | G                    | A     | C     | A     | U     | G     | U     | U     |
| CAU187                         | 1                  | S     | G                    | A     | C     | A     | U     | G     | U     | U     |
| CAU359                         | 1                  | S     | G                    | A     | C     | A     | U     | G     | U     | U     |
| CAU360                         | 1                  | S     | G                    | A     | C     | A     | U     | G     | U     | U     |
| CAU361                         | 1                  | S     | G                    | A     | C     | A     | U     | G     | U     | U     |
| CAU362                         | 1                  | S     | G                    | A     | C     | A     | U     | G     | U     | U     |
| CAU363                         | 1                  | S     | G                    | A     | C     | A     | U     | G     | U     | U     |
| CAU364                         | 1                  | S     | G                    | A     | C     | A     | U     | G     | U     | U     |
| CAU365                         | 1                  | S     | G                    | A     | C     | A     | U     | G     | U     | U     |
| CAU366                         | 1                  | S     | G                    | A     | C     | A     | U     | G     | U     | U     |
| CAU367                         | 1                  | S     | G                    | A     | C     | A     | U     | G     | U     | U     |
| <b>VRE<sub>fm</sub></b> CAU368 | 1                  | S     | G                    | A     | C     | A     | U     | G     | U     | U     |
| CAU369                         | 1                  | S     | G                    | A     | C     | A     | U     | G     | U     | U     |
| CAU370                         | 1                  | S     | G                    | A     | C     | A     | U     | G     | U     | U     |
| CAU371                         | 1                  | S     | G                    | A     | C     | A     | U     | G     | U     | U     |
| CAU372                         | 1                  | S     | G                    | A     | C     | A     | U     | G     | U     | U     |
| CAU373                         | 1                  | S     | G                    | A     | C     | A     | U     | G     | U     | U     |
| CAU374                         | 1                  | S     | G                    | A     | C     | A     | U     | G     | U     | U     |
| CAU375                         | 1                  | S     | G                    | A     | C     | A     | U     | G     | U     | U     |
| CAU376                         | 1                  | S     | G                    | A     | C     | A     | U     | G     | U     | U     |
| CAU377                         | 1                  | S     | G                    | A     | C     | A     | U     | G     | U     | U     |
| CAU378                         | 1                  | R     | G                    | A     | C     | A     | U     | G     | U     | U     |

\*Note: PLEs: Pleuromutilin antibiotics.

**Supplementary Table 5 Information of 13 plasmids containing *vanA* genes in *E. faecium***

|    | <b>Plasmids</b>      | <b>Source</b> | <b>Length (bp)</b> | <b>Genbank</b> | <b>Reference</b> |
|----|----------------------|---------------|--------------------|----------------|------------------|
| 1  | <b>pEMA120</b>       |               | 79797              | KX853854.1     | <sup>3</sup>     |
| 2  | <b>pEM19081</b>      | China         | 61320              | NZ_KN880430.1  | <sup>4</sup>     |
| 3  | <b>pVRE1</b>         |               | 132733             | CP040742.1     | NCBI             |
| 4  | <b>pZB18</b>         | Japan         | 68058              | AB611033.1     | NCBI             |
| 5  | <b>p2014-VREF-63</b> | Korea         | 287502             | CP019989.1     | NCBI             |
| 6  | <b>pIP816</b>        |               | 34616              | NC_011140.1    | <sup>5</sup>     |
| 7  | <b>pVEF3</b>         |               | 63135              | AM931300       | <sup>6</sup>     |
| 8  | <b>pVEF1</b>         | Norway        | 39626              | NC_008768.1    | <sup>6</sup>     |
| 9  | <b>pVEF2</b>         |               | 39714              | NC_008821.1    |                  |
| 10 | <b>pVEF4</b>         |               | 44443              | FN424376.1     | NCBI             |
| 11 | <b>pVRE001</b>       |               | 59226              | CP018072.1     | <sup>7</sup>     |
| 12 | <b>pEFA-790c</b>     | USA           | 35515              | NZ_CP025755.1  | NCBI             |
| 13 | <b>pS177</b>         |               | 39032              | HQ115078.1     | <sup>8</sup>     |

280

**Supplementary Tables 6 Primers for SELECT qPCR or qRT-PCR assay**

---

| SELECT qPCR primers | Sequences                                            |
|---------------------|------------------------------------------------------|
| 23S-m6A1-up         | TAGCCAGTACCGTAGTGCGGTCAAACACTACAGTAAAGCTCCATGGGGTCTT |
| 23S-m6A1-down       | TCCGTCCTGTCGCGGGTAACCTGCATCTTCCAGAGGCTGAGTCGCTGCAT   |
| qPCR primers        | Sequences                                            |
| qPCR-F              | ATGCAGCGACTCAGCCTCTG                                 |
| qPCR-R              | TAGCCAGTACCGTAGTGCGTG                                |

---

281

282

**Supplementary Tables 7 Primers for RT-PCR assay**

| Primers           | Sequences              | Reference     |
|-------------------|------------------------|---------------|
| 16S - F           | CCTACGGGAGGCAGCAG      | <sup>9</sup>  |
| 16S - R           | ATTACCGCGGCTGCTGGC     |               |
| <i>msrC</i> - 1F  | CAGCAAACACTACGGACAAGCG | This study    |
| <i>msrC</i> - 1R  | GTCGGCGAAAATGGTTCAGG   |               |
| <i>lsaE1</i> - F  | AAGCCGAATGGTCTCGTTCC   | This study    |
| <i>lsaE1</i> - R  | CGCTGATCTGGGTCTCCATC   |               |
| <i>eatAv</i> - 1F | TTCAGGTCCTAACGGTGCAG   | This study    |
| <i>eatAv</i> - 1R | TCCATCCCAAGCTTTCGGAG   |               |
| <i>vanS</i> - F   | CCGCTGCATACAGTGAGGAT   | <sup>10</sup> |
| <i>vanS</i> - R   | CCGTATCGGAAGAACGAGCA   |               |
| <i>vanR</i> - F   | GGCACAAGCGGCCTTACTAT   |               |
| <i>vanR</i> - R   | TAACTCCAGTGGGCGAAAGG   |               |



286  
287  
288

**Supplementary Table 8** MICs of multiple antibiotics in wild-type *E. faecium* and mutant ( $\mu\text{g/mL}$ ).

|                                  | Pleuromutilin antibiotics |      |      |      |      |     |      |      |
|----------------------------------|---------------------------|------|------|------|------|-----|------|------|
|                                  | LMU                       | RET  | VAL  | TIA  | AZA  | VAN | LIN  | ERY  |
| Wild-type                        | 0.06                      | 0.06 | 0.06 | 0.25 | 0.25 | 2   | 1    | 1    |
| Mutant<br>(pAM401+ <i>msrC</i> ) | 16                        | 16   | 16   | 32   | 32   | 2   | >128 | >128 |

289  
290  
291  
292

LMU: Lefamulin; RET: Retapamulin; VAL: Valnemulin; TIA: Tiamulin; AZA: Azamulin; VAN: Vancomycin; LIN: Lincomycin; ERY: Erythromycin.

293  
294  
295  
296  
297  
298  
299  
300  
301  
302  
303  
304  
305  
306  
307  
308  
309  
310  
311  
312  
313  
314  
315  
316  
317  
318  
319  
320  
321  
322  
323  
324  
325

## References

- 1 Sun, L. Y. et al. Identification of novel conjugative plasmids with multiple copies of *fosB* that confer high-level fosfomicin resistance to Vancomycin-resistant *Enterococci*. *Front Microbiol* **8**, 1541 (2017).
- 2 Simons, J. A. Snoep, J. L. Feitz, S. Mattos, T. M. J. D. & Neijssel, O. M. Anaerobic 2-ketogluconate metabolism of *Klebsiella pneumoniae* NCTC 418 grown in chemostat culture: Involvement of the pentose phosphate pathway. *J Gen Microbiol*, **138**,423-428 (1992).
- 3 Schouten, M. A. et al. Vancomycin-resistant *Enterococci* isolated from patients in Europe shows geographic transposon type clustering. *Antimicrob Agents Chemother* **45**, 986-989 (2001).
- 4 Arthur, M. Molinas, C. Depardieu, F. & Courvalin, P. Characterization of Tn1546, a Tn3-related transposon conferring glycopeptide resistance by synthesis of depsipeptide peptidoglycan precursors in *Enterococcus faecium* BM4147. *Bacteriol* **175**, 117-127 (1993).
- 5 Sletvold, H. et al. Complete sequence of *Enterococcus faecium* pVEF3 and the detection of an omega-epsilon-zeta toxin-antitoxin module and an ABC transporter. *Plasmid* **60**, 75-85 (2008)
- 6 Sletvold, H. et al. Comparative DNA analysis of two *vanA* plasmids from *Enterococcus faecium* strains isolated from poultry and a poultry farmer in Noway. *Antimicrob Agents Chemother* **51**, 736-739 (2007).
- 7 Honsa, E. S. et al. RelA mutant *Enterococcus faecium* with multi-antibiotic tolerance arising in an immunocompromised host. *mBio* **8**, e02124-02116 (2017).
- 8 Halvorsen, E. M. Williams, J. J. Bhimani, A. J. Billings, E. A. & Hergenrother, P. J. Txe, an endoribonuclease of the enterococcal Axe-Txe toxin-antitoxin system, cleaves mRNA and inhibits protein synthesis. *Microbiology* **157**, 387-397 (2010).
- 9 Lam, S. J. et al. Combating multidrug-resistant Gram-negative bacteria with structurally nanoengineered antimicrobial peptide polymers. *Nat. Microbiol*, 16162 (2016).
- 10 Silva, B. N. M. D. et al. Expression of *vanA*-type vancomycin resistance in a clinical isolate of *Enterococcus faecium* showing insertion of IS19 in the *vanS* gene. *Int J Antimicrob Agents* **55**, 105897 (2020).
